# Supplementary material for: Fork-shaped paper SERS sensors coated with raspberry-like bimetallic nanospheres for the detection of the boosted mixture: experimental design and applications
Source: Royal Society of Chemistry journal article supplement (doi:10.1039/d0tc04646a), 2021-01-01
Supplement: d0tc04646a1.pdf [file d0tc04646a1.pdf]

*Supporting Information for*

**Fork-shaped Paper SERS Sensor Coated with Raspberry-like  
Bimetal Nanospheres for Boosted Mixture Detection:  
Experimental Design and Application**

Yuanyuan Xu<sup>1</sup>, Xingguo Gao<sup>1</sup>, Cheng Yang<sup>2</sup>, Baoyuan Man<sup>2\*</sup>, Jiancai  
Leng<sup>1\*</sup>

1. School of Science, Qilu University of Technology (Shandong Academy of Sciences), Jinan 250353, People's Republic of China.
2. School of Physics and Electronics, Shandong Normal University, Jinan 250014, People's Republic of China.

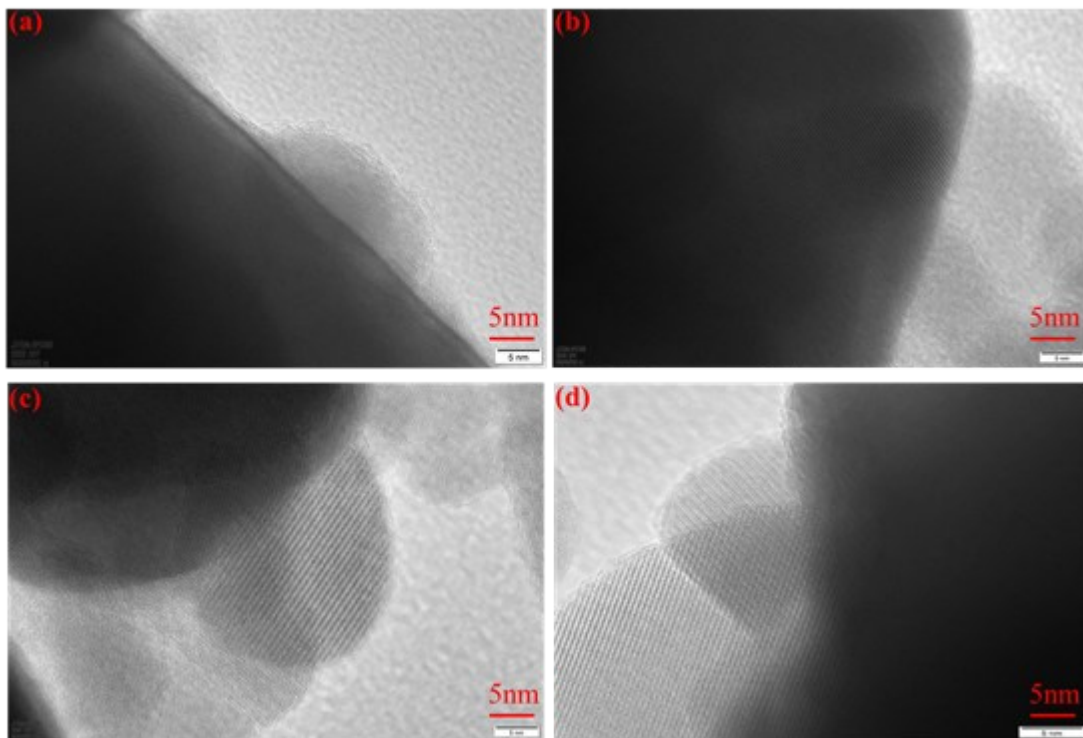

**Fig. S1.** High resolution TEM images of raspberry-like bimetal Au@AgNPs.

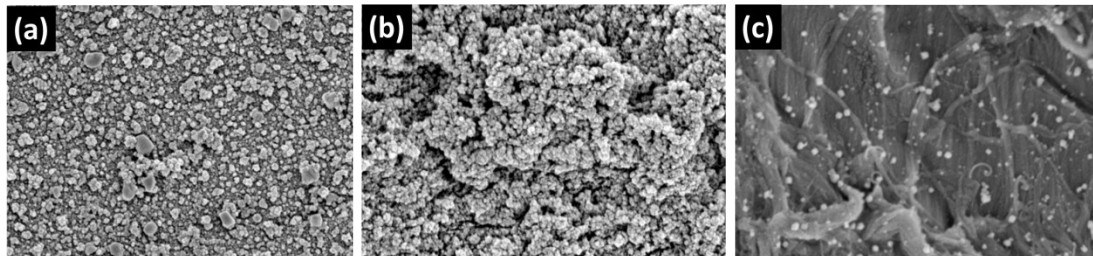

**Fig. S2.** SEM images of AgNPs/paper substrates obtained by growth solution of different concentration (a) 0.04M and (c) 0.01M. (b) SEM images of AgNPs/paper (Fig. S2a) after exposing to the HAuCl<sub>4</sub> solution.

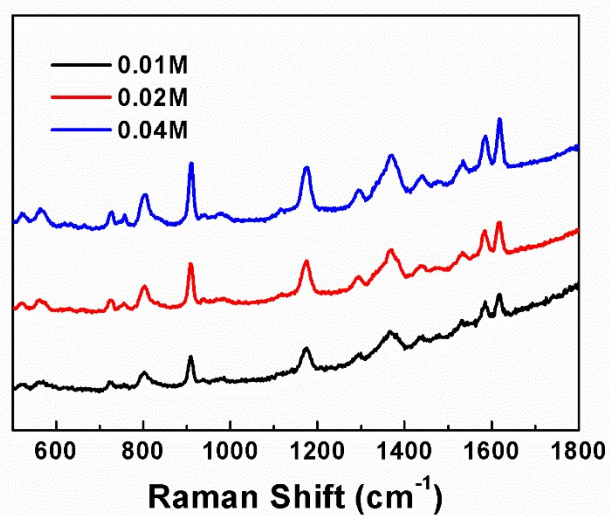

**Fig. S3.** The Raman spectra of  $10^{-7}$  M CV on different AgNPs/paper substrates.

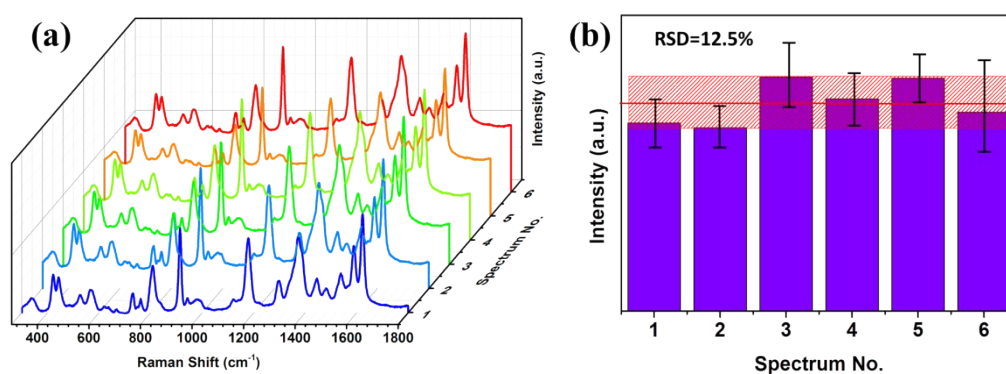

**Fig. S4.** (a) SERS signals of CV molecules at  $10^{-8}$  M from 6 different batches paper substrates. (b) Intensity distribution of the peak at  $914 \text{ cm}^{-1}$ .

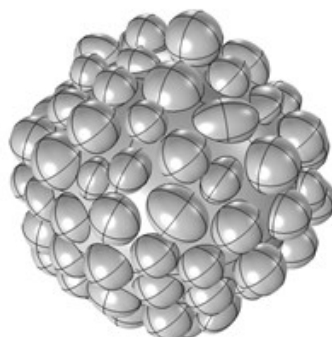

**Fig. S5.** Model of Raspberry-like bimetal Au@AgNP used in the COMSOL software according to its SEM images.

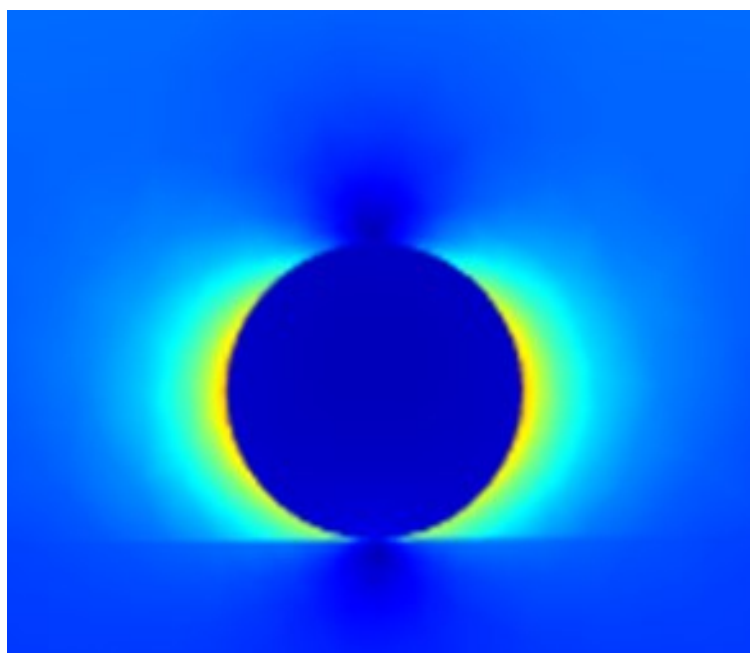

**Fig. S6.** The electric field distribution on the AgNP.

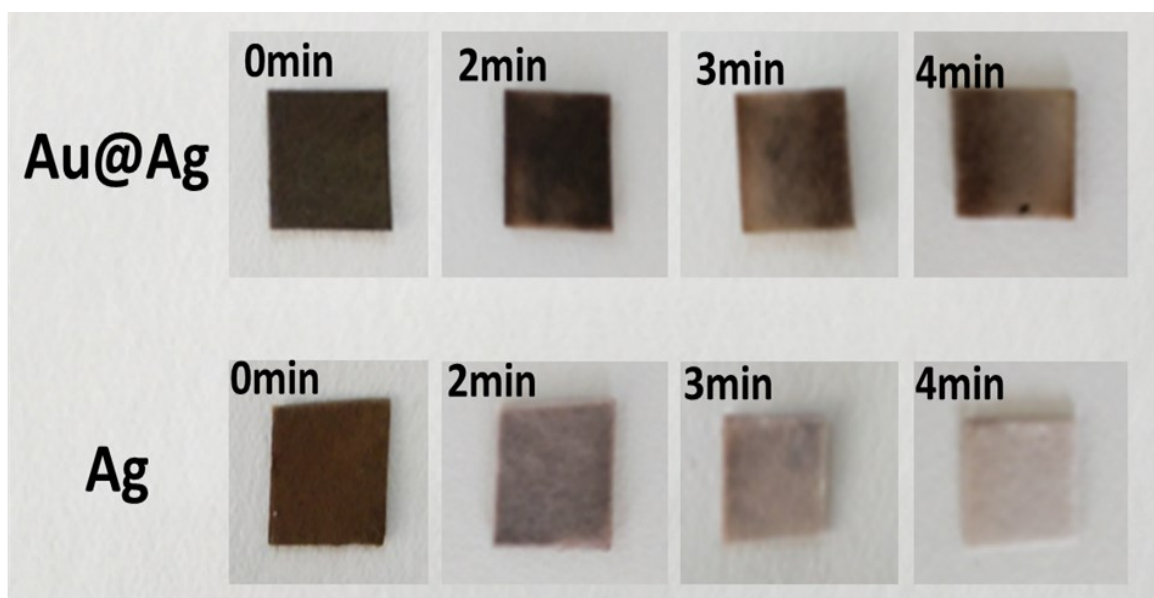

**Fig. S7.** Optical photos of both paper substrates after immersing in aqueous H<sub>2</sub>O<sub>2</sub> for different time.

Table S1. The limit of detections for different mixtures reached in the SERS paper substrates combined paper chromatography.

| Substrates                            | Analytes                                | LOD                                                                                       | Reference |
|---------------------------------------|-----------------------------------------|-------------------------------------------------------------------------------------------|-----------|
| Ag@SiO <sub>2</sub> paper             | R6G and malachite green                 | 0.5 mM and 0.5 mM                                                                         | Ref. 1    |
| Ag nanoislands/paper                  | CR, TB and CV                           | 50 mM, 40 mM and 5 mM                                                                     | Ref. 2    |
| AuNP/MoS <sub>2</sub> /filter paper   | CV and TB                               | 10 <sup>-8</sup> M and 10 <sup>-8</sup> M                                                 | Ref. 3    |
| AgNPs/paper                           | R6G, methylene blue and malachite green | 1 mM, 1 mM and 1 mM                                                                       | Ref. 4    |
| AgNPs /filter paper                   | R6G, CR, CV and MO                      | 4×10 <sup>-4</sup> M, 4×10 <sup>-4</sup> M, 4×10 <sup>-4</sup> M and 4×10 <sup>-4</sup> M | Ref. 5    |
| ZnO/AgNPs/paper                       | Dimethoate and thiuram                  | 54.57 μg/L and 19.16 μg/L                                                                 | Ref. 6    |
| Raspberry-like bimetal Au@AgNPs/paper | CV and fluorescein                      | 10 <sup>-9</sup> M and 10 <sup>-9</sup> M                                                 | This work |

References:

1. K. Zhang, J. Qing, H. Gao, J. Ji, B. Liu, Coupling shell-isolated nanoparticle enhanced Raman spectroscopy with paper chromatography for multi-components on-site analysis, *Talanta*, 2017, 162, 52-56.
2. H. Jung, M. Park, M. Kang, K.-H. Jeong, Silver nanoislands on cellulose fibers for chromatographic separation and ultrasensitive detection of small molecules, *Light: Science & Applications*, 2016, 5, e16009.
3. Y. Zhao, X. Pan, L. Zhang, Y. Xu, C. Li, J. Wang, J. Ou, X. Xiu, B. Man, C. Yang, Dense AuNP/MoS<sub>2</sub> hybrid fabrication on fiber membranes for molecule separation and SERS detection, *RSC Advances*, 2017, 7, 36516-36524.
4. W.W. Yu, I.M. White, Chromatographic separation and detection of target analytes from complex samples using inkjet printed SERS substrates, *Analyst*, 2013, 138, 3679-3686.
5. J.D. Weatherston, R.K.O. Seguban, D. Hunt, H.-J. Wu, Low-Cost and Simple Fabrication of Nanoplasmonic Paper for Coupled Chromatography Separation and Surface Enhanced Raman Detection, *ACS Sensors*, 2018, 3, 852-857.

6. X. Jin, P. Guo, P. Guan, S. Wang, Y. Lei, G. Wang, The fabrication of paper separation channel based SERS substrate and its recyclable separation and detection of pesticides, *Spectrochimica Acta Part A: Molecular and Biomolecular Spectroscopy*, 2020, 240, 118561.
